# 1 Speciation trajectories in recombining bacterial species

2 Pekka Marttinen<sup>1,2,\*</sup>, William P. Hanage<sup>2</sup>

3 <sup>1</sup>Helsinki Institute for Information Technology HIIT, Department of Computer Science, Aalto University,  
4 Finland, <sup>2</sup>Center for Communicable Disease Dynamics, Department of Epidemiology, Harvard TH Chan  
5 School of Public Health, USA.

6 \*pekka.marttinen@aalto.fi

7 While speciation in eukaryotes is well-studied (Coyne *et al.*, 2004), a controversy over the nature of  
8 bacterial species due to recombination between distant strains continues (Fraser *et al.*, 2007). It is generally  
9 agreed that bacterial diversity can be classified into genetically and ecologically cohesive units (Vos, 2011;  
10 Caro-Quintero and Konstantinidis, 2012; Shapiro and Polz, 2014), but what produces such variation is a  
11 topic of intensive research (Cohan and Perry, 2007; Shapiro, 2014; Shapiro *et al.*, 2016). Recombination may  
12 maintain coherent species of frequently recombining bacteria (Fraser *et al.*, 2009; Marttinen *et al.*, 2015;  
13 Dixit *et al.*, 2016), but the emergence of distinct clusters within a recombining species, and the impact of  
14 habitat structure in this process are not well described, limiting our understanding of how new species are  
15 created. Here we present a model of bacterial evolution in overlapping habitat space. We show three different  
16 outcomes are possible for a pair of clusters, depending on the size of their habitat overlap: fast divergence with  
17 little interaction between the clusters, slow divergence with frequent recombination between the clusters, and  
18 stationary or near stationary population structure, where the clusters remain at an equilibrium distance for  
19 an indefinite time. We fit our model to two data sets. In *Streptococcus pneumoniae*, we find a genomically and  
20 ecologically distinct subset, held at a relatively constant genetic distance from the majority of the population  
21 through frequent recombination with it, while in *Campylobacter jejuni*, we find a minority population we  
22 predict will continue to diverge at a higher rate. This approach may predict and define speciation trajectories  
23 in multiple bacterial species.

24 Several explanations have been offered for the genetic and ecological differentiation between bacterial  
25 populations. In the Ecotype Model (Cohan and Perry, 2007), ecological niche -specific adaptive mutations  
26 cause genome-wide selective sweeps that purge variability among isolates in the same the niche, resulting  
27 in genetically differentiated clusters that correspond to niches. While recombination may maintain genetic  
28 coherence, as discussed above, theory suggests selection is necessary for genetic diversification (Polz *et al.*,  
29 2013). Recently, a model of ecological differentiation among sympatric recombining bacteria has been de-  
30 veloped (Shapiro *et al.*, 2012; Friedman *et al.*, 2013). The model assumes an initial freely recombining  
31 population, and the differentiation is triggered by an acquisition of a few habitat-specific alleles through  
32 horizontal gene transfer. If the habitat-specificity results in varying recombination rates within and between  
33 habitats, for example due to increased physical proximity or sequence similarity, the result is gradual di-  
34 versification across the genome, eventually creating genomically and ecologically distinct clusters. Unlike in  
35 the Ecotype Model, which assumes genome-wide sweeps, here the sweeps occur only for the habitat-specific  
36 genes, but the overall genetic differentiation does not happen immediately, thanks to frequent recombina-  
37 tion that breaks the linkage between the habitat specific genes and the rest of the genome. The resulting  
38 pattern has a small number of short genome regions with strong habitat association, while the majority of  
39 the genome shows little correlation with the habitat, and such a pattern was observed between a pair of  
40 closely-related *Vibrio* bacteria (Shapiro *et al.*, 2012).

41 Fig. 1 shows population structures in data sets with 616 *Streptococcus pneumoniae* (Croucher *et al.*, 2013)  
42 and 235 *Campylobacter jejuni* samples (Sheppard *et al.*, 2013, 2014; Cody *et al.*, 2013) (see Methods). Both  
43 include strains divergent from the rest of the population, providing us with an opportunity to investigate  
44 the early stages of bacterial differentiation. In particular, the *S. pneumoniae* data consists of 16 sequence  
45 clusters (SCs) of which one, SC12, differs from the rest, and has previously been characterized as atypical  
46 pneumococci representing a distinct species (Croucher *et al.*, 2013, 2014). All other SCs are at the same  
47 equilibrium distance from each other, maintained by recombination, corresponding to the main mode in the  
48 distance distribution (Marttinen *et al.*, 2015). Two additional modes can be discerned: one close to the  
49 origin comprising the within SC distances, which may be explained by selection of some sort, and the other  
50 representing the broad division of the data into SC12 vs. rest, which indicates less frequent recombination

51 between these two clusters. Whether SC12 is a nascent cluster, which will continue to diverge, is not known.  
52 It is also possible that the distance could be an equilibrium produced by the combination of mutational  
53 divergence and occasional recombination with the parent cluster. A similar minor mode is found in *C.*  
54 *jejuni*, in this case arising from a single divergent isolate shown in red. Whether this is an isolate from a  
55 cluster in the early stages of divergence is similarly unknown.

56 The goal to understand the population sub-divisions observed in Fig. 1 motivated us to develop a model  
57 that could re-produce similar patterns. Previously, models have been used to investigate the impact of  
58 homologous recombination on population structure (Fraser *et al.*, 2009; Doroghazi and Buckley, 2011), the  
59 distribution of accessory genome (Baumdicker *et al.*, 2012; Lobkovsky *et al.*, 2013; Collins and Higgs, 2012),  
60 parallel evolution of the core and accessory genomes (Marttinen *et al.*, 2015), and the spread of antibiotic  
61 resistance (Niehus *et al.*, 2015). Here we extend the model of sympatric differentiation (Shapiro *et al.*, 2012;  
62 Friedman *et al.*, 2013) in two ways. First, we introduce an explicit, controllable barrier for recombination  
63 between the two populations, and second, we derive an analytical approximation of the model. An outline of  
64 the resulting 'Overlapping Habitats Model', is shown in Fig. 2. Its key characteristic is the existence of two  
65 populations of different types of strains living in partially overlapping habitats. Recombination between the  
66 populations only occurs between individuals in the shared habitat, while migration enables strains to move  
67 between strain type specific and shared parts of the habitat space (see Methods). The explicit barrier for  
68 recombination together with the analytical approximation make it for the first time possible to do inference  
69 about the amount of interaction between the populations. In particular, the model allows us to rapidly  
70 predict how the population structure will evolve given a certain amount of habitat overlap, and, on the other  
71 hand, to learn the parameters resulting in a given equilibrium population structure.

72 To investigate the impact of habitat structure on population structure, we simulated the Overlapping  
73 Habitats Model for 100,000 generations with two clusters, each with 5,000 strains. We varied the amount  
74 of habitat overlap and migration, but used realistic mutation and recombination rates (see Methods). Fig.  
75 3 shows how the within and between cluster distances evolved during the simulation. As expected with  
76 the smallest overlap (left-most panels), the limited interaction resulted in rapid divergence of the clusters,  
77 although within cluster distances reached an equilibrium as expected (Fraser *et al.*, 2007; Marttinen *et al.*,  
78 2015). With the largest overlap (right panels) two distinguishable clusters emerged, with the between cluster  
79 distance exceeding the within distance. However the clusters did not proceed to full separation, but rather  
80 maintained an equilibrium level of separation for what appeared to be an indefinitely long time. With an  
81 intermediate overlap the simulation still had characteristics of the stationary behaviour; however, now the  
82 clusters slowly drifted apart as a result of genes one by one escaping the equilibrium. To understand the  
83 equilibrium, we first note that if the clusters are already very close, then a recombination event between them  
84 does not make them any more similar. If the clusters are very distant, the ability to recombine vanishes.  
85 Intuitively, the equilibrium, if such exists, is located at an intermediate distance where the cohesive force of  
86 recombination equals the diversifying force of mutation.

87 We next investigated which of the three alternative types of differentiation: equilibrium, slow divergence,  
88 or rapid clonal divergence, best explains the population divisions in the *S. pneumoniae* and *C. jejuni* data  
89 (Fig. 1). To fit the Overlapping Habitats Model, which represents the equilibrium or slow divergence cases,  
90 we tentatively assumed the distances between the divergent strains and other strains to be at equilibrium,  
91 and used a plug-in recombination rate estimate from the literature to compute the approximate overlap that  
92 would produce the observed level of separation (see Methods). For both data sets, a simulation with these  
93 parameters resulted in two separate clusters that were diverging slowly, with rates of 0.32 (*S. pneumoniae*)  
94 and 0.45 (*C. jejuni*) relative to the clonal divergence rates. This indicates the separation between the clusters,  
95 especially in the *C. jejuni* data, has exceeded the level where recombination could prevent the divergence,  
96 and, consequently, the equilibrium distance is easy to escape. However, these results alone do not yet allow  
97 us to separate the two possible explanations: first, the clusters are in the process of slow divergence, as just  
98 described, or second, the clusters are in the process of rapid clonal diversification, and the distance between  
99 them just happens momentarily to be as observed.

100 A detailed comparison of the models' outputs revealed a systematic difference in the ecoSNP distributions  
101 between the scenarios of clonal divergence vs. equilibrium or slow divergence, where ecoSNPs are defined,  
102 as in (Shapiro *et al.*, 2012), as variants present in all strains of one cluster and absent from all strains of the  
103 other cluster. In particular, with rapid divergence and little recombination between the clusters, the ecoSNPs  
104 were rather uniformly distributed across the genes (Fig. 4). On the other hand, under the equilibrium the

majority of ecoSNPs were concentrated in only a few genes that already had escaped the equilibrium, while the majority of genes had no ecoSNPs at all. For both data sets, the ecoSNP distribution supports the interpretation that the observed population structure is a result of equilibrium or slow divergence, rather than rapid clonal divergence. In the *S. pneumoniae* data the observed proportion of genes with no ecoSNPs is even higher than predicted by the overlap model, suggesting that previously published recombination rates may be underestimates.

We note that the concentration of ecoSNPs in a few genome regions has previously been taken as evidence for gene-specific sweeps of habitat-specific adaptive alleles acquired through horizontal gene transfer (Shapiro *et al.*, 2012). Our results suggest a similar pattern may emerge as a result of drift making a region divergent enough between the clusters to reduce their ability to recombine within the region, after which the region continues rapid diversification while the rest of the genome remains at equilibrium. This recalls the concept of 'fragmented' speciation in which different parts of the genome speciate at different times (Retchless and Lawrence, 2010), except in this case this can be achieved without explicit selective processes on the diverging region. Eventually this results in highly divergent habitat-specific loci surrounded by regions with little habitat association. In practice this process could happen together with selection at the habitat-specific loci, as both processes have the potential to increase differentiation and create ecoSNPs between the clusters. We note that while quantitatively the simulation output obviously depends on the exact parameter values, qualitatively the conclusions regarding the main patterns observed in the data sets seem robust across a wide range of parameter values.

We have introduced the Overlapping Habitats Model and shown that with realistic parameter values stationary or nearly stationary population divisions may emerge, creating what might be termed 'satellite species' as seen in *S. pneumoniae*, and that these may be distinguished from dynamically diverging clusters using ecoSNPs, as shown by the analysis of *C. jejuni*. In our model the habitat could represent, for example, physical separatedness, biochemical properties, or any abstract division of the space according to the Hutchinson's  $n$ -dimensional niche (Hutchinson, 1957). Our model is mainly about recombination; the ecological and selective aspects are implicit and follow from the division of the habitat-space into regions suitable for different strain types. The habitat-specificity is assumed heritable and non-mutable, and could in practice be caused by a small number of genes. Despite the simplicity of the model, it adequately captured the main sub-divisions in two data sets. Nonetheless, much of the ecological and genomic structure in the data will not be captured by the model, for example the individual sequence clusters within the main group in the *S. pneumoniae* data. Our model does not contradict with this additional structure, but instead shows that the individual sequence clusters can indeed be ecologically different, and still maintain the equilibrium distance between them, as a mere 60% habitat overlap already is sufficient for this (Fig. 3). Our model provides means to characterize equilibrium structures in bacterial populations and we believe it will be helpful to understand similar patterns in many other bacterial genomic data sets.

## Methods

### Data

Core gene alignments and the cluster annotation of the *S. pneumoniae* strains were obtained from (Croucher *et al.*, 2013). As an additional data cleaning step, we removed all genes whose alignment length was less than 265bp, which corresponded to the 0.05th quantile of the lengths of the alignments of the core genes. This step was added to increase confidence in the genes detected. This left us with 1,191 core genes in the 616 pneumococcal isolates. More specifically, the genes are here clusters of orthologous genes (COGs), and we use these terms interchangeably.

The *C. jejuni* data consisted of 239 previously published genomes (Sheppard *et al.*, 2013, 2014; Cody *et al.*, 2013). From the reference-based assemblies mapped to the NCTC11168 reference genome, we extracted 423 COGs using ROARY (Page *et al.*, 2015) with default settings. As a data cleaning step, we removed four isolates with significantly increased levels of missing data. Additionally, we removed COGs whose alignment lengths were less than the 0.05th quantile (225bp) of all lengths. This left us with 401 COGs with 235 isolates. The divergent isolate in Fig. 1 differs from others in terms of its sampling location (New Zealand), and by being the only isolate sampled from 'environment' and having ST=2381.

## Simulation model

As the basis of our model, we use a Wright-Fisher forward simulation of discrete generations, where each generation is sampled with replacement from strains in the previous generation. In our model, a strain is represented by a collection of genes, similar to (Fraser *et al.*, 2007), and we assume the genes are 'core', i.e., present in all strains. Each gene is encoded as a binary sequence of fixed length (500 bp). Our model has in total four free parameters: mutation rate, homologous recombination rate, the proportion of habitat overlap, and migration rate. Mutations and recombinations are assumed to take place between sampling of the generations. Mutations change one base in the target sequence, while recombination is assumed to result in the whole gene of the recipient to be replaced by the corresponding gene of the donor. Recombination is allowed only between strains within the same habitat, and accepted with probability that declines with respect to increasing sequence divergence (Zawadzki *et al.*, 1995; Vulić *et al.*, 1997; Majewski *et al.*, 2000). As opposed to (Fraser *et al.*, 2007; Marttinen *et al.*, 2015), we simulate complete binary sequences, avoiding the need for additional approximations.

A population of strains of two types,  $A$  and  $B$ , is simulated. We assume the strain types live in different habitats, such that type  $A$  strains live in habitat  $a$  and type  $B$  strains in habitat  $b$ ; however, part of the habitat space is shared such that both strain types can inhabit it, and we denote the shared part by  $ab$ . Habitat-specificity encoding genes are assumed implicit and not simulated in our model, and we assume that a strain type can not be changed by recombination or mutation. Migration of type  $A$  strains between habitats  $a$  and  $ab$  is achieved by sampling the next generation of strains in  $a$ , for example, from all type  $A$  strains such that strains in  $ab$  are sampled with a relative weight determined by the migration parameter. This corresponds to the assumption that strains within each habitat compete against each other and those trying to enter the habitat. In detail, the sampling scheme can be described as follows. We denote by  $A_a$  and  $A_{ab}$  type  $A$  strains that are currently in  $a$  or  $ab$  environments;  $B_b$  and  $B_{ab}$  are defined correspondingly. We sample strains for  $a$  with replacement from  $A_a$  and  $A_{ab}$  such that the probability of sampling a strain  $x$  is equal to

$$\Pr(x) = \frac{1}{|A_a| + m|A_{ab}|}, \text{ if } x \in A_a, \quad (1)$$

and

$$\Pr(x) = \frac{m}{|A_a| + m|A_{ab}|}, \text{ if } x \in A_{ab}, \quad (2)$$

where  $0 \leq m \leq 1$  is the migration parameter. Value  $m = 0$  corresponds to no migration, in which case Equations 1 and 2 reduce to sampling the next generation for environment  $a$  from strains already in that environment. On the other hand,  $m = 1$  corresponds to unlimited migration, and the next generation is sampled with equal probability from all type  $A$  strains in both environments  $a$  and  $ab$ . Strains for the  $b$  environment are sampled similarly from strains in  $b$  and  $ab$  environments. Finally, strains for the  $ab$  environment are sampled according to

$$\Pr(x) = \frac{1}{m|A_a| + m|B_b| + |A_{ab}| + |B_{ab}|}, \quad (3)$$

if  $x \in A_{ab}$  or  $x \in B_{ab}$ ,

and

$$\Pr(x) = \frac{m}{m|A_a| + m|B_b| + |A_{ab}| + |B_{ab}|}, \quad (4)$$

if  $x \in A_a$  or  $x \in B_b$ .

Thus, if  $m = 0$ , the next generation of strains for the  $ab$  environment is sampled from strains already in the environment. In the other extreme ( $m = 1$ ), the strains are sampled from all strains in both populations.

## Deterministic approximation of the model

We also derive a deterministic approximation of the Overlapping Habitats Model, which enables rapid prediction of the evolution of the population structure without simulating the actual sequences. The model is based on average distances between and within the different sub-groups of the whole population:  $A_a$ ,

187  $A_{ab}$ ,  $B_{ab}$ , and  $B_b$  (see the previous sub-section). In detail, let  $\mathbf{d}$  be a vector comprising all 4 within and 6  
188 between distances possible for the four groups. In the Supplementary Text S1, we derive a function  $f$ , that  
189 expresses how the average distances in the next generation,  $\mathbf{d}^*$ , approximately depend on the distances  $\mathbf{d}$  in  
190 the current generation:

$$\mathbf{d}^* = f(\mathbf{d}). \quad (5)$$

191 One of the main interests is to identify stationary points in the distance distribution, i.e., distances  $\mathbf{d}$ , for  
192 which

$$\mathbf{d} = f(\mathbf{d}) \quad (6)$$

193 holds.

We have implemented two methods to solve Equation (6). The first consists of using the update rule (5) repeatedly until the  $\mathbf{d}$  converges, in which case the stationarity condition (6) is satisfied. The second way to solve (6) is to use a quasi-Newton method, implemented in the *optim*-function of the R software, to minimize the objective function  $h$ , defined as follows:

$$h(\mathbf{d}) = \|f(\mathbf{d}) - \mathbf{d}\|_2 \quad (7)$$

$$= \left[ \sum_{i=1}^{10} (f_i - d_i)^2 \right]^{\frac{1}{2}}, \quad (8)$$

194 where  $f_i$  is the prediction for the  $i$ th element in the distance vector of the next generation, and  $d_i$  the current  
195 value of the corresponding element. In practice, we have reached the best performance by first running the  
196 Newton's method, which is fast, followed by the robust sequential update procedure to confirm convergence.

197 Investigation of Fig. 3 reveals that the deterministic approximation predicts the within cluster distances  
198 observed in simulation with high accuracy. Also, with the smallest overlap, the deterministic approximation  
199 does not have a solution, allowing us to immediately predict the rapid divergence seen in the simulation.  
200 However, we also see that the approximation has a tendency to underestimate the between cluster distances  
201 compared to the simulation. The reason for this is that the deterministic approximation is based on average  
202 distances within and between the populations, and therefore it does not account for variation in distances  
203 between specific donor and recipient alleles, resulting in overestimation of the impact of recombination.  
204 For the same reason it is not possible to use the approximation to determine how easy it is to escape the  
205 equilibrium mode in the distance distribution. Therefore, we adopted in our analyses a strategy to first  
206 estimate the parameters with the deterministic approximation (see below), and then run the simulation  
207 model with the learned parameter values to produce the final detailed prediction.

## 208 Model fitting

209 As discussed above, the *S. pneumoniae* data can be broadly divided into two sub-populations. To estimate  
210 the habitat overlap, we tentatively assumed the population structure, i.e., the within and between sub-  
211 population distances observed, represented an equilibrium. We fitted the model by solving the deterministic  
212 formula to determine parameter values that produced the distances in the data (*within*=0.01, *between*=0.017)  
213 as a stationary condition (Fig. S2). To determine the remaining parameters, we set the recombination rate,  
214  $r/m$  to a previously reported value  $r/m = 11.3$  (Croucher *et al.*, 2013). The proportion of diverging strains  
215 of the whole population was set to 5%, and migration to 0.5 (results were insensitive to these choices, see  
216 Fig. S2). These specifications led to an estimate of 41% habitat overlap.

217 The parameters for the *C. jejuni* were estimated similarly. In detail, we assumed that the *within* pop-  
218 ulation distance was 0.015 (the main mode) in the data and the *between* distance 0.03 (the small separate  
219 mode). We fixed the recombination rate to a plug-in estimate of  $r/m = 49$ , derived from an estimate that 98  
220 percent of substitutions in MLST genes in the species are due to recombinations (Yu *et al.*, 2012). We again  
221 set the proportion of the diverging strains to be 5% of the whole population. These specifications yielded  
222 an estimate of 24% habitat overlap.

223 For both data sets, we set the total number of strains simulated as 10,000 and the number of genes as  
224 30. As each gene had length 500, this corresponded to the total genome size of 15,000 bp. The probability  
225 of accepting a recombination was assumed to decline log-linearly with respect to the distance between the  
226 alleles in the donor and recipient strains, according to  $10^{-Ax}$ , where  $x$  is the Hamming distance between the

227 alleles. We used  $A = 18$  for the parameter that determines the rate of the decline, according to empirical  
228 data, see Fraser *et al.* (2007).

### 229 Code availability

230 R-code to run the model is available at [https://users.ics.aalto.fi/~pemartti/habitat\\_simulation/](https://users.ics.aalto.fi/~pemartti/habitat_simulation/).

### 231 Acknowledgements

232 This work was funded by the Academy of Finland (grants no. 286607 and 294015 to PM). The authors thank  
233 Sam Sheppard, University of Oxford, for providing the *C. jejuni* data, and Brian Arnold, Harvard T.H.  
234 Chan School of Public Health, for assistance with data processing and helpful comments. The calculations  
235 presented above were performed using computer resources within the Aalto University School of Science  
236 "Science-IT" project.

### 237 References

- 238 Baumdicker, F., Hess, W. R., and Pfaffelhuber, P. 2012. The infinitely many genes model for the distributed  
239 genome of bacteria. *Genome Biology and Evolution*, 4(4): 443–456.
- 240 Caro-Quintero, A. and Konstantinidis, K. T. 2012. Bacterial species may exist, metagenomics reveal. *Envi-*  
241 *ronmental Microbiology*, 14(2): 347–355.
- 242 Cody, A. J., McCarthy, N. D., van Rensburg, M. J., Isinkaye, T., Bentley, S. D., Parkhill, J., Dingle, K. E.,  
243 Bowler, I. C., Jolley, K. A., and Maiden, M. C. 2013. Real-time genomic epidemiological evaluation of  
244 human *Campylobacter* isolates by use of whole-genome multilocus sequence typing. *Journal of Clinical*  
245 *Microbiology*, 51(8): 2526–2534.
- 246 Cohan, F. M. and Perry, E. B. 2007. A systematics for discovering the fundamental units of bacterial  
247 diversity. *Current Biology*, 17(10): R373–R386.
- 248 Collins, R. E. and Higgs, P. G. 2012. Testing the infinitely many genes model for the evolution of the  
249 bacterial core genome and pangenome. *Molecular Biology and Evolution*, 29(11): 3413–3425.
- 250 Coyne, J. A., Orr, H. A., *et al.* 2004. *Speciation*, volume 37. Sinauer Associates Sunderland, MA.
- 251 Croucher, N. J., Finkelstein, J. A., Pelton, S. I., Mitchell, P. K., Lee, G. M., Parkhill, J., Bentley, S. D.,  
252 Hanage, W. P., and Lipsitch, M. 2013. Population genomics of post-vaccine changes in pneumococcal  
253 epidemiology. *Nature Genetics*, 45(6): 656–663.
- 254 Croucher, N. J., Coupland, P. G., Stevenson, A. E., Callendrello, A., Bentley, S. D., and Hanage, W. P.  
255 2014. Diversification of bacterial genome content through distinct mechanisms over different timescales.  
256 *Nature Communications*, 5.
- 257 Dixit, P., Pang, T. Y., and Maslov, S. 2016. Recombination-driven genome evolution and stability of bacterial  
258 species. *bioRxiv*, page 067942.
- 259 Doroghazi, J. R. and Buckley, D. H. 2011. A model for the effect of homologous recombination on microbial  
260 diversification. *Genome Biology and Evolution*, 3: 1349.
- 261 Fraser, C., Hanage, W. P., and Spratt, B. G. 2007. Recombination and the nature of bacterial speciation.  
262 *Science*, 315(5811): 476–480.
- 263 Fraser, C., Alm, E. J., Polz, M. F., Spratt, B. G., and Hanage, W. P. 2009. The bacterial species challenge:  
264 making sense of genetic and ecological diversity. *Science*, 323(5915): 741–746.
- 265 Friedman, J., Alm, E. J., and Shapiro, B. J. 2013. Sympatric speciation: when is it possible in bacteria.  
266 *PLoS ONE*, 8(1): e53539.

- 267 Hutchinson, G. E. 1957. Concluding remarks. *Cold Spring Harbor Symposia on Quantitative Biology*, 22:  
268 415–427.
- 269 Lobkovsky, A. E., Wolf, Y. I., and Koonin, E. V. 2013. Gene frequency distributions reject a neutral model  
270 of genome evolution. *Genome Biology and Evolution*, 5(1): 233–242.
- 271 Majewski, J., Zawadzki, P., Pickerill, P., Cohan, F. M., and Dowson, C. G. 2000. Barriers to genetic  
272 exchange between bacterial species: *Streptococcus pneumoniae* transformation. *Journal of Bacteriology*,  
273 182(4): 1016–1023.
- 274 Marttinen, P., Croucher, N. J., Gutmann, M., Corander, J., and Hanage, W. P. 2015. Recombination  
275 produces coherent bacterial species clusters in both core and accessory genomes. *Microbial Genomics*, 1.
- 276 Niehus, R., Mitri, S., Fletcher, A. G., and Foster, K. R. 2015. Migration and horizontal gene transfer divide  
277 microbial genomes into multiple niches. *Nature Communications*, 6.
- 278 Page, A. J., Cummins, C. A., Hunt, M., Wong, V. K., Reuter, S., Holden, M. T., Fookes, M., Falush, D.,  
279 Keane, J. A., and Parkhill, J. 2015. Roary: rapid large-scale prokaryote pan genome analysis. *Bioinforma-*  
280 *matics*, 31(22): 3691–3693.
- 281 Polz, M. F., Alm, E. J., and Hanage, W. P. 2013. Horizontal gene transfer and the evolution of bacterial  
282 and archaeal population structure. *Trends in Genetics*, 29(3): 170–175.
- 283 Retchless, A. C. and Lawrence, J. G. 2010. Phylogenetic incongruence arising from fragmented speciation  
284 in enteric bacteria. *Proceedings of the National Academy of Sciences*, 107(25): 11453–11458.
- 285 Shapiro, B. J. 2014. Signatures of natural selection and ecological differentiation in microbial genomes. In  
286 C. R. Landry and N. Aubin-Horth, editors, *Ecological Genomics: Ecology and the Evolution of Genes and*  
287 *Genomes*, pages 339–359. Springer.
- 288 Shapiro, B. J. and Polz, M. F. 2014. Ordering microbial diversity into ecologically and genetically cohesive  
289 units. *Trends in Microbiology*, 22(5): 235–247.
- 290 Shapiro, B. J., Friedman, J., Cordero, O. X., Preheim, S. P., Timberlake, S. C., Szabó, G., Polz, M. F., and  
291 Alm, E. J. 2012. Population genomics of early events in the ecological differentiation of bacteria. *Science*,  
292 336(6077): 48–51.
- 293 Shapiro, B. J., Leducq, J.-B., and Mallet, J. 2016. What is speciation? *PLoS Genetics*, 12(3): e1005860.
- 294 Sheppard, S. K., Didelot, X., Méric, G., Torralbo, A., Jolley, K. A., Kelly, D. J., Bentley, S. D., Maiden,  
295 M. C., Parkhill, J., and Falush, D. 2013. Genome-wide association study identifies vitamin B5 biosynthesis  
296 as a host specificity factor in *Campylobacter*. *Proceedings of the National Academy of Sciences*, 110(29):  
297 11923–11927.
- 298 Sheppard, S. K., Cheng, L., Méric, G., Haan, C., Llarena, A.-K., Marttinen, P., Vidal, A., Ridley, A.,  
299 Clifton-Hadley, F., Connor, T. R., *et al.* 2014. Cryptic ecology among host generalist *Campylobacter*  
300 *jejuni* in domestic animals. *Molecular Ecology*, 23(10): 2442–2451.
- 301 Vos, M. 2011. A species concept for bacteria based on adaptive divergence. *Trends in Microbiology*, 19(1):  
302 1–7.
- 303 Vulić, M., Dionisio, F., Taddei, F., and Radman, M. 1997. Molecular keys to speciation: DNA polymorphism  
304 and the control of genetic exchange in enterobacteria. *Proceedings of the National Academy of Sciences*,  
305 94(18): 9763–9767.
- 306 Yu, S., Fearnhead, P., Holland, B. R., Biggs, P., Maiden, M., and French, N. 2012. Estimating the relative  
307 roles of recombination and point mutation in the generation of single locus variants in *Campylobacter*  
308 *jejuni* and *Campylobacter coli*. *Journal of Molecular Evolution*, 74(5-6): 273–280.
- 309 Zawadzki, P., Roberts, M. S., and Cohan, F. M. 1995. The log-linear relationship between sexual isolation  
310 and sequence divergence in bacillus transformation is robust. *Genetics*, 140(3): 917–932.

## *S. pneumoniae*

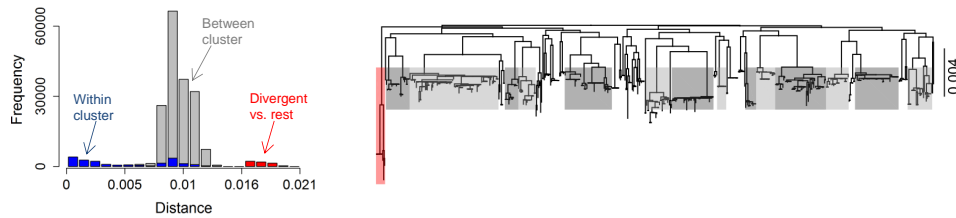

## *C. jejuni*

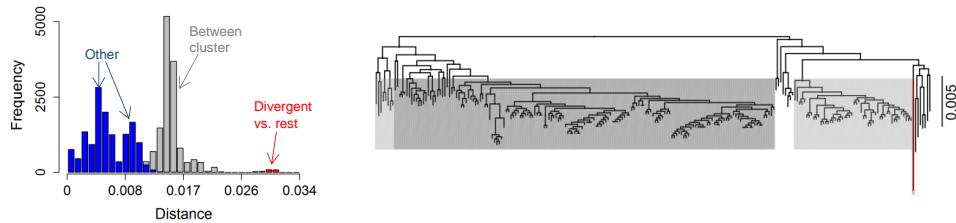

Figure 1: **Population structures in *S. pneumoniae* and *C. jejuni* data sets.** The left panels show distributions of pairwise distances computed between all strain pairs in the data sets, and the right panels show the phylogenies. In the *S. pneumoniae* phylogeny, previously identified 16 sequence clusters are annotated as follows: the divergent cluster with red, 14 other monophyletic clusters with gray, and the remaining non-monophyletic cluster is not colored. Distances within and between these clusters are annotated in the distance histogram. Similarly, for *C. jejuni*, three clusters corresponding to separate branches of the phylogeny are colored with gray and one divergent strain with red, and the distances within and between these clusters are shown in the histogram. Annotation "Other" refers to within cluster comparisons as well as distances between the non-colored strains and other strains.

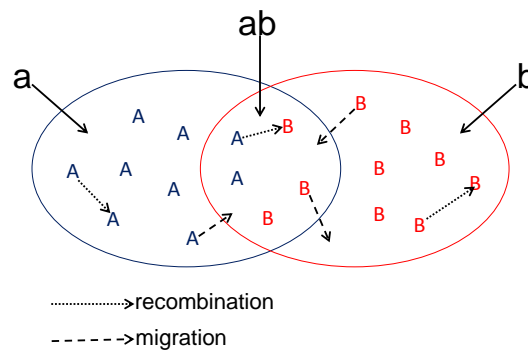

Figure 2: **Outline of the Overlapping Habitats Model.** The model assumes two types of strains, *A* and *B*, that live in habitats *a* or *b*, respectively. In addition, both types can live in the intersection of the habitats, denoted as *ab*. Type *A* strains can migrate between *a* and *ab* and type *B* strains between *b* and *ab*. Strain can recombine with other strains in the same habitat.



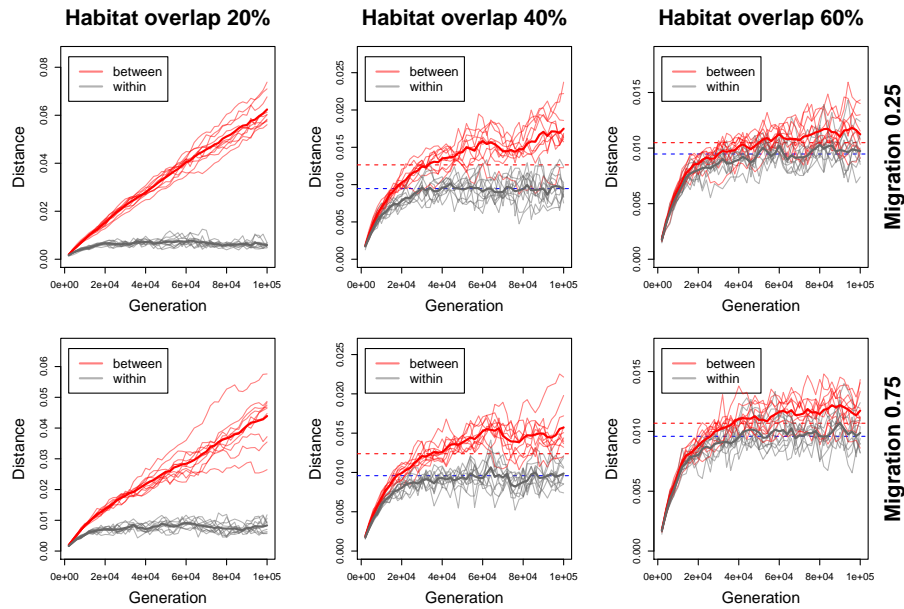

Figure 3: **Simulation results from the Overlapping Habitats Model.** The figure shows the evolution of distances within and between strain types in simulations with  $10^6$  generations. The solid thin red and gray lines show the median between and within strain type distances in ten repetitions, and the thick lines show the averages across the repetitions. The dashed horizontal lines show the predicted equilibrium distances from the deterministic approximation. If no dotted line is shown, the deterministic model did not have a solution.

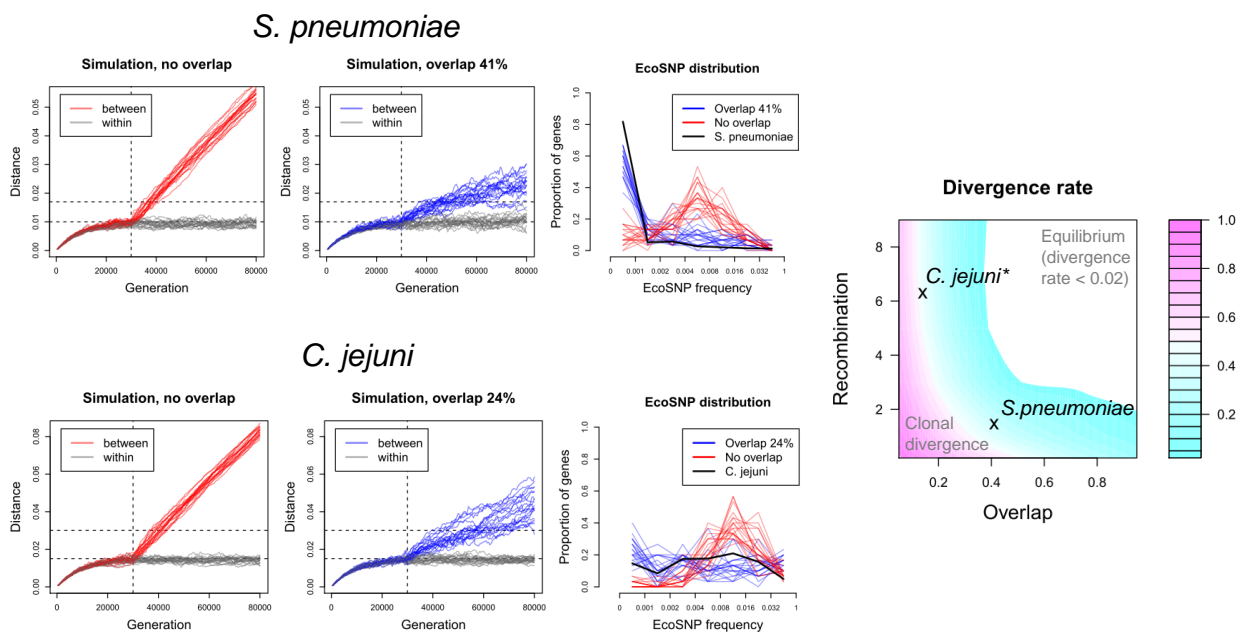

Figure 4: **Comparing model output with the *S. pneumoniae* and *C. jejuni* data, and a summary of divergence rates.** For each data set, we simulated the Overlapping Habitats Model 20 times without overlap (leftmost small panels) and with the estimated overlap (center small panels). A barrier representing the size of the overlap between the clusters was introduced at the 30,000th generation (dashed vertical line) after which the clusters diverged. The horizontal lines show for reference the within and between cluster distances in *S. pneumoniae* and *C. jejuni*. Simulated ecoSNP distributions with and without overlap, computed at the generation when the simulated between-cluster distance matched the observed value, are compared with the observed ecoSNP distributions (rightmost small panels). The panel on the right summarizes the simulated rate of divergence between the two clusters relative to the clonal divergence. (\*the heatmap is based on the mutation rate in *S. pneumoniae*, and, therefore, the location of *C. jejuni* is modified by moving it to the closest contour line corresponding to the divergence rate estimated using the correct mutation rate, for which results are shown in Supplementary Fig. S3)
